# Supplementary material for: Enzyme-Catalyzed Synthesis of Water-Soluble Conjugated Poly[2-(3-thienyl)-Ethoxy-4-Butylsulfonate]
Source: Polymers (Basel). 2016 Apr 13;8(4):139. doi: 10.3390/polym8040139 (PMC6431961; doi:10.3390/polym8040139)

# Supplementary Materials: Enzyme-Catalyzed Synthesis of Water-Soluble Conjugated Poly[2-(3-thienyl)-Ethoxy-4-Butylsulfonate]

Yun Zhao, Hongyan Zhu, Xinyang Wang, Yingying Liu, Xiang Wu, Heyuan Zhou and Zhonghai Ni

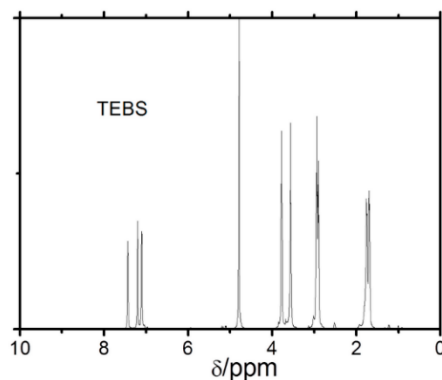

Figure S1.  $^1\text{H}$  NMR spectrum of (3-thienyl)-ethoxy-4-butylsulfonate (TEBS).

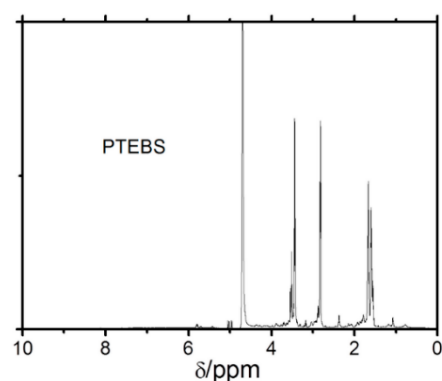

Figure S2.  $^1\text{H}$  NMR spectrum of poly[2-(3-thienyl)-ethoxy-4-butylsulfonate] (PTEBS).

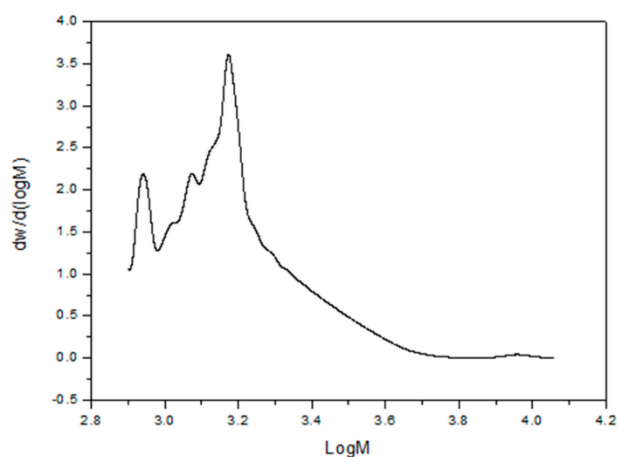

Figure S3. GPC trace of PTEBS.

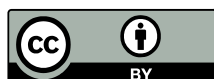

Supplement: Supplementary file 1 [file polymers-08-00139-s001.pdf]
